# Supplementary material for: Nickel-catalyzed oxidative coupling of alkynes and arylboronic acids using the metal–organic framework Ni2(BDC)2(DABCO) as an efficient heterogeneous catalyst
Source: Royal Society of Chemistry journal article supplement (doi:10.1039/c3cy01053h), 2014-01-01
Supplement: c3cy01053h1.pdf [file c3cy01053h1.pdf]

**Nickel-catalyzed oxidative coupling of alkynes and aryl boronic acids using metal-organic  
framework  $\text{Ni}_2(\text{BDC})_2(\text{DABCO})$  as an efficient heterogeneous catalyst**

Thanh Truong, Chung K. Nguyen, Thi V. Tran, Tung T. Nguyen, Nam T. S. Phan \*

Department of Chemical Engineering, HCMC University of Technology, VNU-HCM,

268 Ly Thuong Kiet, District 10, Ho Chi Minh City, Viet Nam

\*Email: [ptsnam@hcmut.edu.vn](mailto:ptsnam@hcmut.edu.vn)

Ph: (+84 8) 38647256 ext. 5681

Fx: (+84 8) 38637504

**Supporting information**

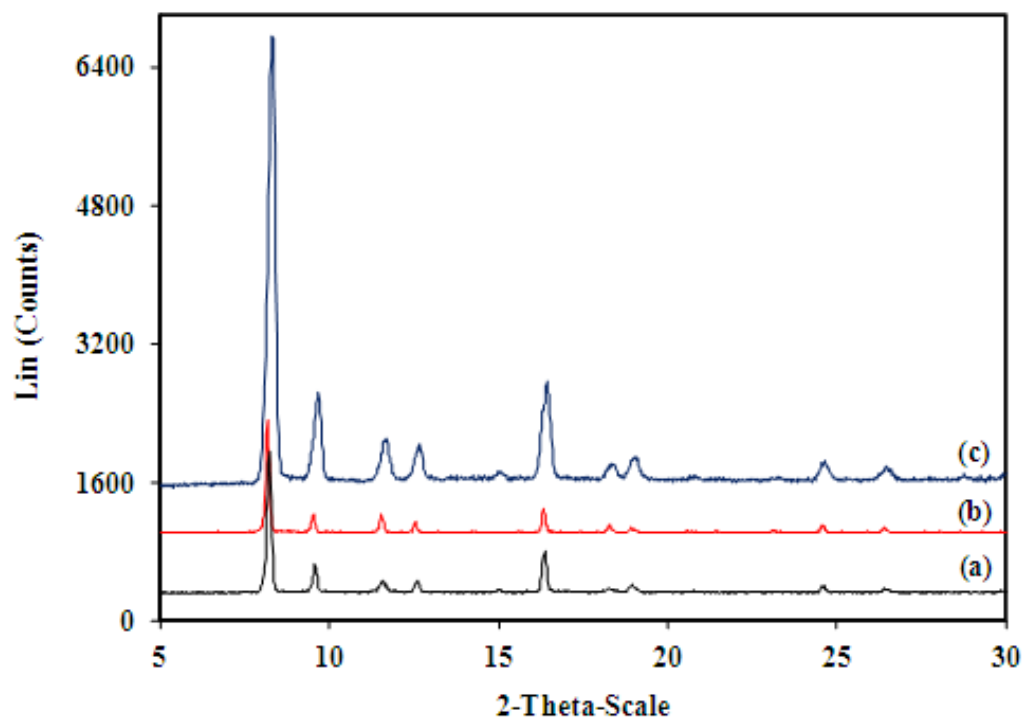

Fig. S1. X-ray powder diffractograms of the as-synthesized (a),  $\text{CH}_3\text{OH}$ -exchanged (b), and activated (c)  $\text{Ni}_2(\text{BDC})_2(\text{DABCO})$ .

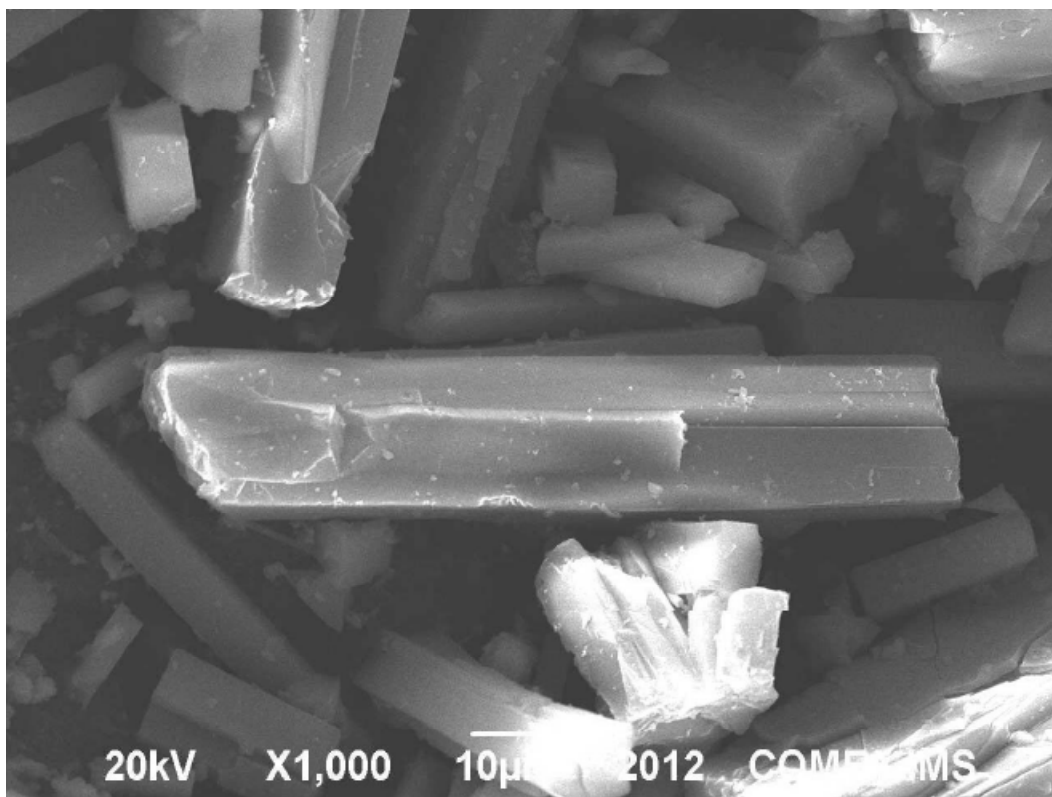

Fig. S2. SEM micrograph of the Ni<sub>2</sub>(BDC)<sub>2</sub>(DABCO).

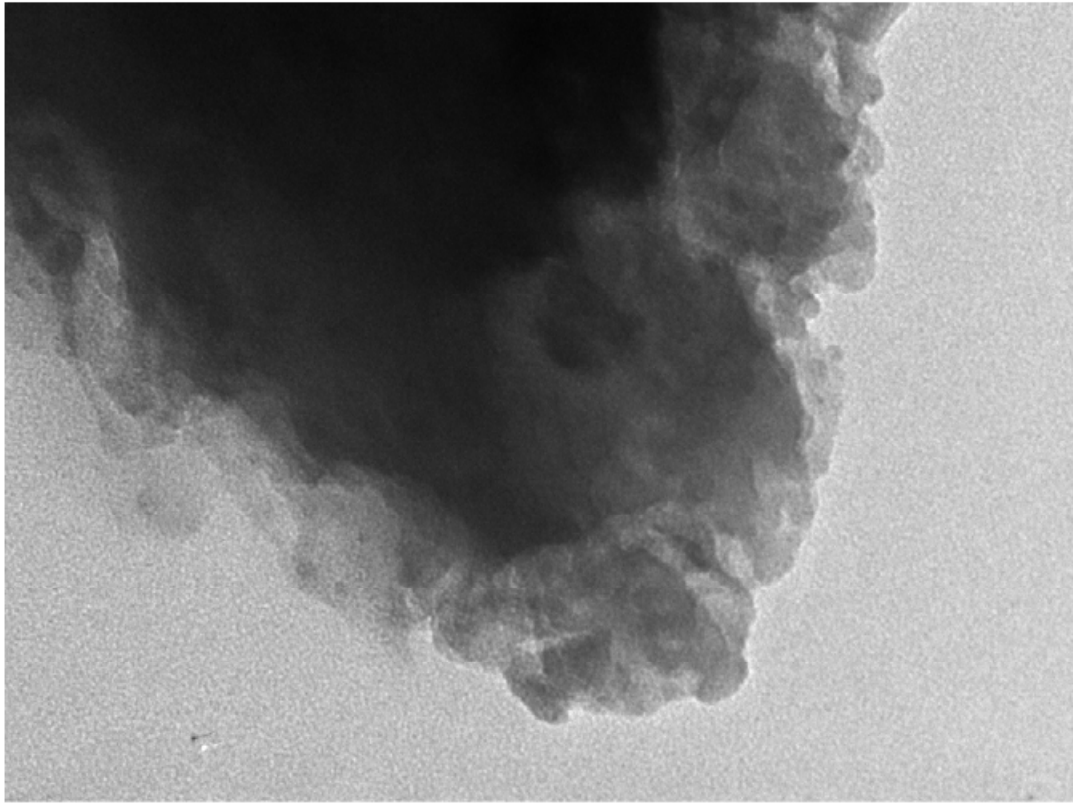

100 nm

Fig. S3. TEM micrograph of the  $\text{Ni}_2(\text{BDC})_2(\text{DABCO})$ .

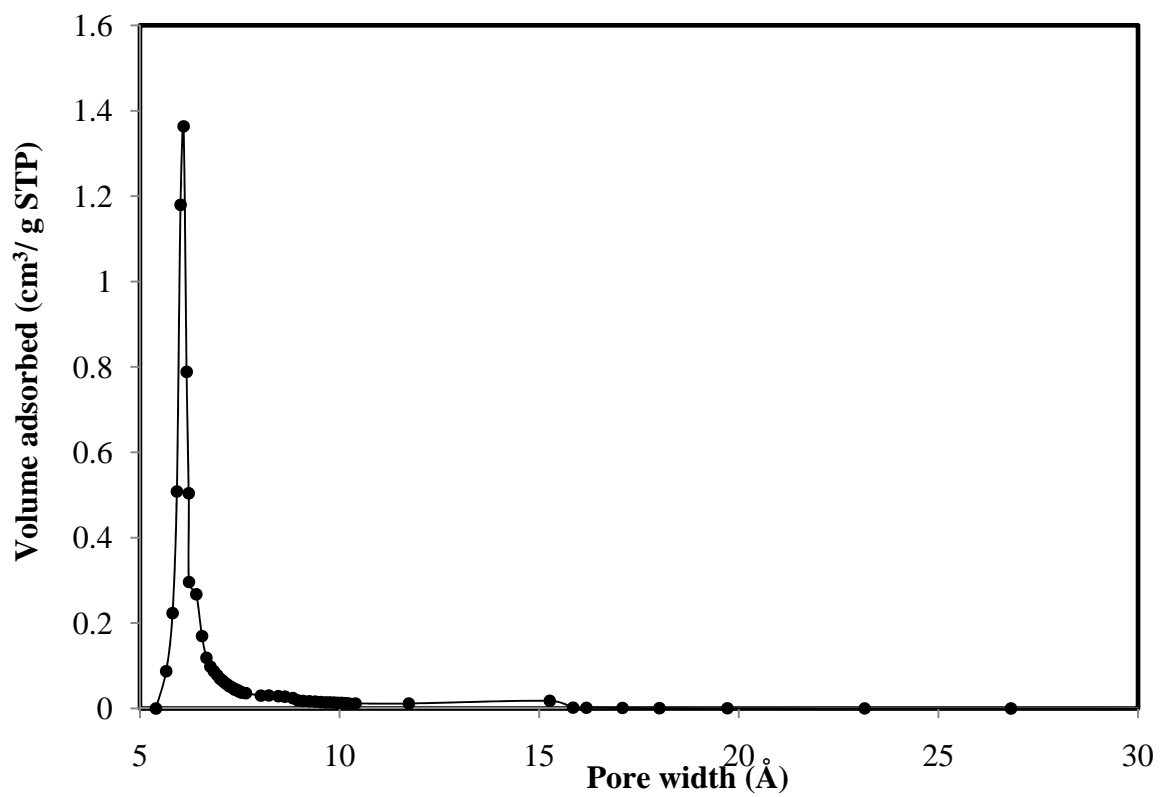

Fig. S4. Pore size distribution of the  $\text{Ni}_2(\text{BDC})_2(\text{DABCO})$ .

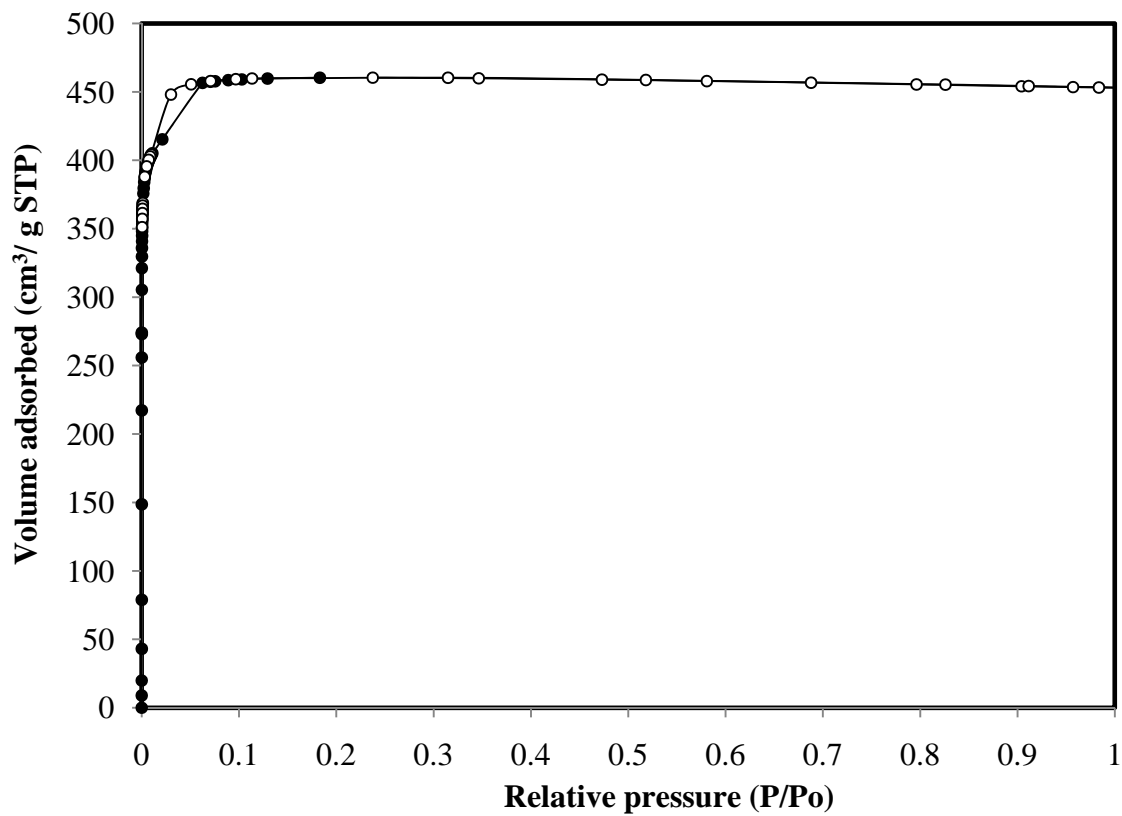

Fig. S5. Nitrogen adsorption/desorption isotherm of the Ni<sub>2</sub>(BDC)<sub>2</sub>(DABCO). Adsorption data are shown as closed circles and desorption data as open circles.

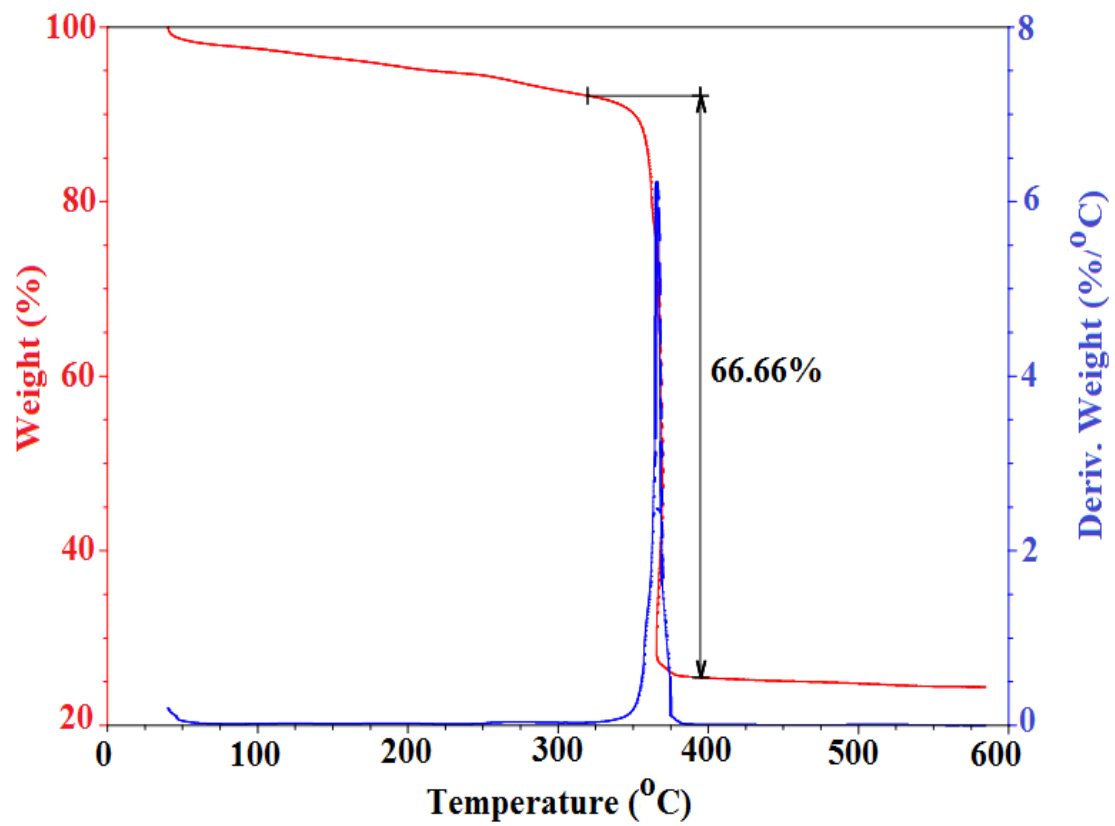

Fig. S6. TGA analysis of the  $\text{Ni}_2(\text{BDC})_2(\text{DABCO})$ .

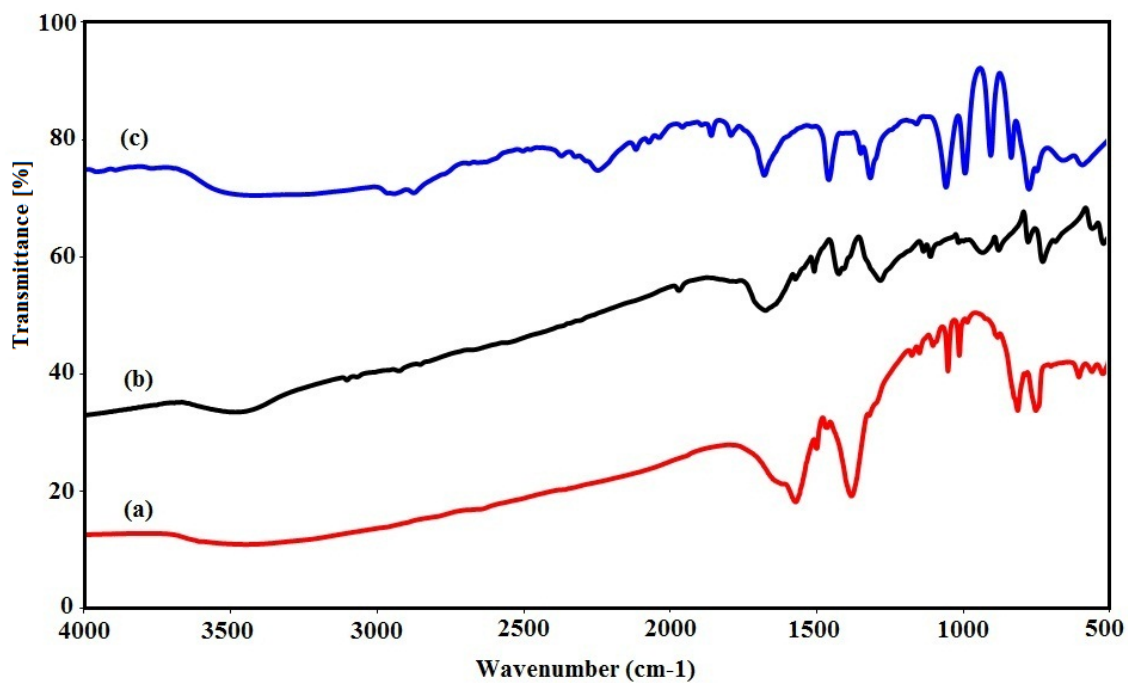

Fig. S7. FT-IR spectra of the  $\text{Ni}_2(\text{BDC})_2(\text{DABCO})$  (a), 1,4-benzenedicarboxylic acid (b), and 1,4-diazabicyclo[2.2.2]octane (c).

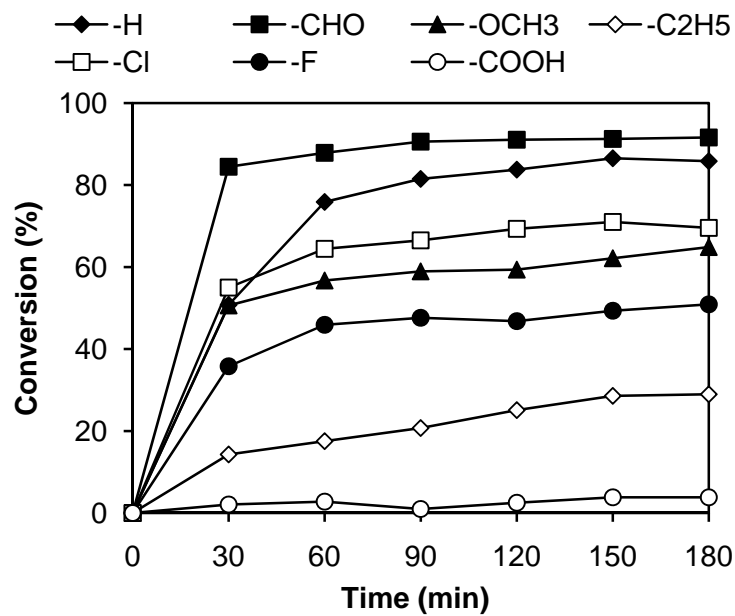

Fig. S8. Effect of different phenylboronic acids on reaction conversions.

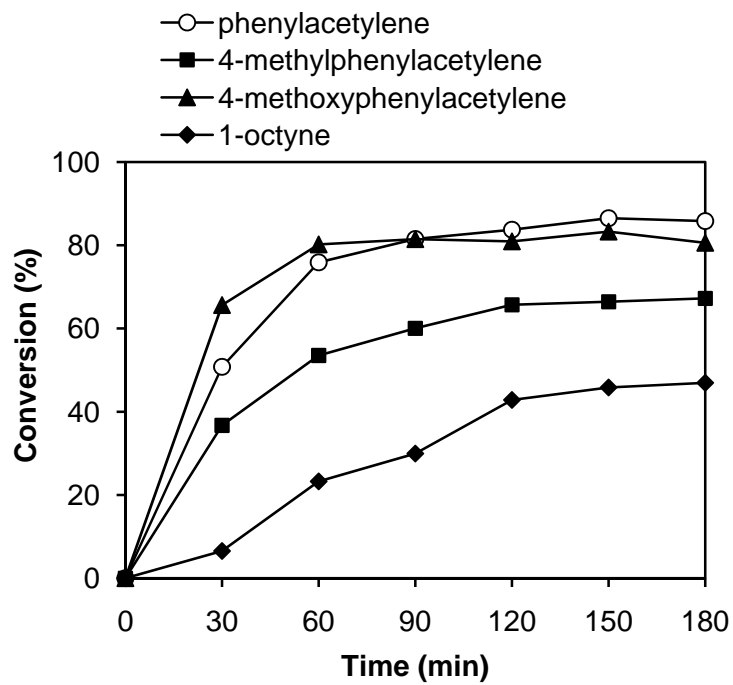

Fig. S9. Effect of different alkynes on reaction conversions.
